1 **Pre-departure psychological distress and associated factors among migrant**  
2 **workers of Nepal**

3 Om Prakash Poudel<sup>1\*</sup>, Bijay Thapa<sup>1</sup>, Shital Bhandary<sup>1</sup>

4

5 <sup>1</sup> School of Public Health, Patan Academy of Health Sciences, Lalitpur Nepal

6

7 \* Corresponding author

8 Emai: [ompoudelskt@gmail.com](mailto:ompoudelskt@gmail.com) (OPP)

9

10

11

12

13

14

15

## 16 **Abstract**

### 17 ***Introduction***

18 Foreign employment is the most significant motivation for international migration in Nepal.  
19 However, migrant workers are vulnerable to many exploitations that lead to psychological  
20 distress during the pre-departure phase and at the destination. The study aimed to identify the  
21 prevalence and associated factors for psychological distress among migrant workers during the  
22 pre-departure phase.

### 23 ***Methods***

24 This was a cross-sectional study based on the representative sample of 445 migrant workers. A  
25 21-item Depression Anxiety Stress Scale (DASS-21) and Pre-Departure Risk Factors Perception  
26 Scale (PD-RFPS) at the workplace were self-administered to migrant workers selected randomly  
27 attending the pre-departure orientation program. Bivariate and multivariate logistic regression  
28 was performed to identify the associated factors.

### 29 ***Results***

30 Prevalence of psychological distress (Depression, Anxiety and Stress) was identified as 20.9%  
31 and female (AOR=2.02, p-value=0.041) and perception of bad working conditions (AOR=2.44,  
32 p-value=0.046) were found significantly associated with pre-departure psychological distress.

### 33 ***Conclusion***

34 Data suggests the presence of symptoms of psychological distress among migrant workers  
35 during the pre-departure phase and perception of risk factors at the workplace were found  
36 significantly associated with pre-departure psychological distress. Concern bodies should

37 provide in-depth orientation on possible risk factors at the destination and coping skills for  
38 psychological distress during the pre-departure orientation program.

## 39 **Introduction**

40 The number of international migration has continued to grow and estimated to around 272  
41 million in 2019. Among these migrants, most of them were of the working age group (20-64  
42 years of age) [1]. With the increase in the number of international migration, the global flow of  
43 remittance had been increased in the recent decades [2]. In Nepal, foreign employment is the  
44 most significant motivation for international migration. Although India is the popular destination  
45 for Nepalese migrant workers, it has been decreasing with the rise of labor migration in Gulf  
46 Cooperation Council (GCC) and Malaysia in the last decades. Limited opportunities,  
47 responsibilities towards family well-being, and attraction of Gulf countries are the major reasons  
48 behind the migration towards GCC countries [3]. In Nepal, more than half of the migrant  
49 workers acquired a permit to GCC countries and around thirty percent of permits were issued for  
50 Malaysia during past decades [4].

51 Migrant workers face different kinds of challenges in personnel, family, and social life. These  
52 workers go through different phases that include pre-departure, short-term and long-term  
53 transient, destination situation, and return to a place of origin. In each phase, potential health risk  
54 and protective factors exist that have a short-term or long-term impact on the well-being of  
55 migrant workers [5]. Most of the Nepalese migrants work in semi-skilled and low skilled jobs,  
56 which are often difficult, dangerous and degradable leading to poor mental health [6]. In Nepal,  
57 607 deaths among male and 43 among female were reported due to suicide while working  
58 abroad, during the period of 2008/2009 to 2016/2017 [4].

59 Pre-departure and in-service at the destination are the two major stages where migrant workers  
60 are vulnerable to exploitation like manipulation of contract, hiring for non-existent jobs, poor  
61 working conditions, wages below standard, health and safety risk, and prolonged debt period that  
62 results in psychological distress [7]. Therefore, instead of focusing only on tertiary prevention,  
63 targeting the pre-departure determinant of the problem would be the most appropriate approach  
64 as primary prevention to improve the psychological well-being of the migrant workers. For that  
65 reason, the objective of this study was to identify the prevalence of psychological distress and its  
66 associated factors among migrant workers of Nepal departing to GCC countries.

## 67 **Methods**

68 This was a cross-sectional study conducted among migrant workers attending a pre-departure  
69 orientation program. A total of 445 migrant workers were included from eight randomly selected  
70 orientation-training institutes out of 112 institutes inside Kathmandu valley from July to August  
71 2019. Random allocation of the migrant worker in the study was ensured by selecting the week  
72 to visit institutes randomly. Thereafter, each randomly selected institutes were visited for one  
73 week and all the eligible migrant workers were approached in the study. Those migrant workers  
74 traveling to GCC countries were included in the selection criteria. Whereas, illiterate and non-  
75 Nepali speaking migrant workers were excluded. The questionnaire was self-administered to all  
76 the eligible consented migrant workers. Ethical approval was obtained from the Institutional  
77 Review Committee - Patan Academy of Health Sciences with reference PHP1906281263.

78 Socio-demographic and foreign employment related factors were taken as independent variables  
79 whereas psychological distress was taken as a dependent variable in the study. Socio-  
80 demographic variables included age, sex, religion, ethnicity, education, marital status,

81 occupation, personnel behavior, and place of residence. Similarly, foreign employment related  
82 variables included pre-departure related factors and perception of migrant workers on risk factor  
83 at the workplace. Pre-departure related factors were frequency of travel, the reason for migration,  
84 loan, pre-arranged accommodation at the destination, pre-arranged employment at the  
85 destination, family network available at destination, the language proficiency of destination and  
86 discussion with family. Likewise, PD-RFPS [8] was used to measure the perception of risk  
87 factors in the workplace. Psychological distress was defined as combination of depression,  
88 anxiety and stress and it was measured using DASS-21 scale. DASS-21 is, a globally validated  
89 standard tool to measure depression, anxiety, stress and psychological distress. DASS-21  
90 measures the severity of symptoms of depression, anxiety, and stress, containing seven questions  
91 for each subscale [9]. DASS-21 has already been validated in the Nepali language among  
92 Nepalese migrants residing in Hong Kong [10]. Besides, it has been validated among Nepali  
93 migrant workers during the pre-departure phase from the pilot study, which has been reported  
94 elsewhere [8].

95 Statistical analysis (Descriptive and analytical statistics) was performed using Stata 13 MP  
96 version software. The prevalence of psychological distress was calculated by adding the DASS  
97 total score, which indicates the overall index of negative effects [9]. The score was multiplied by  
98 the factor of two to make comparable with DASS-42. A score of more than 40 was included to  
99 calculate the prevalence of psychological distress indicating the symptoms of moderate or above  
100 in the DASS total score. Bivariate and multivariate logistic regression was performed to identify  
101 the associated factors for psychological distress. Variables found with the p-value of less than  
102 0.25 in the bivariate logistic regression were included in the final multivariate logistic regression  
103 to see the independent effect of the variable on the symptoms of psychological distress.

## 104 **Results**

105 Symptoms of psychological distress were experienced by 20.9% of migrant workers during the  
106 pre-departure phase. Symptoms of psychological distress were more prevalent among females  
107 compared to males. Nearly one-fourth of younger age groups less than 25 years were found with  
108 the symptoms of psychological distress, which was higher than the older age group migrant  
109 workers. Similarly, it was high among those who had smoked in the last month compared to  
110 those who had both smoked and consumed alcohol. Likewise, nearly one-third of unskilled  
111 manual workers were found with symptoms of psychological distress and it was less among the  
112 professional jobholders.

113 Psychological distress was high among those who were traveling for the second time compared  
114 to the first time travelers. Those who were traveling due to poverty, family pressure, and to pay  
115 back debt were found with a higher prevalence of symptoms. Similarly, it was high among those  
116 who had not discussed with their family about foreign employment, had a loan, had not pre-  
117 arranged for employment, had not pre-arranged accommodation, had no family member at the  
118 destination, and who did not understand the language of the destination country.

119 Table 1: Prevalence of psychological distress among migrant workers by independent variables (n=445)

| <b>Variable</b>  | <b>Number</b> | <b>Percentage (95%<br/>CI)</b> | <b>Variable</b>           | <b>Number</b> | <b>Percentage (95%<br/>CI)</b> |
|------------------|---------------|--------------------------------|---------------------------|---------------|--------------------------------|
| <b>Total</b>     | 93            | 20.9 (17.1 – 24.7)             | <b>Gender</b>             |               |                                |
| <b>Age Group</b> |               |                                | Male                      | 71            | 19.6 (15.5 – 23.7)             |
| Less than 25     | 45            | 24.6 (18.3 – 30.9)             | Female                    | 22            | 27.2 (16.9 – 37.4)             |
| 25-34            | 40            | 18.5 (13.2 – 23.8)             | <b>Personnel Behavior</b> |               |                                |

|                           |    |                    |                                |    |                    |
|---------------------------|----|--------------------|--------------------------------|----|--------------------|
| 35-44                     | 7  | 16.3 (5.4 – 27.2)  | Alcohol only                   | 7  | 20.2 (7.7 – 32.6)  |
| 45 or More                | 1  | 23.1 (-15.0– 61.2) | Smoking only                   | 12 | 25 (12.7 – 37.2)   |
| <b>Place of residence</b> |    |                    | Both                           | 9  | 15.9 (6.3 – 25.4)  |
| Urban                     | 46 | 18.4 (13.5 – 23.3) | None                           | 65 | 21.3 (16.6 – 25.9) |
| Rural                     | 47 | 23.9 (18 – 29.9)   | <b>Frequency</b>               |    |                    |
| <b>Ethnicity</b>          |    |                    | First                          | 38 | 19 (13.4 – 24.5)   |
| Brahman                   | 6  | 14.4 (3.3 – 25.5)  | Twice                          | 42 | 24.9 (18.4 – 31.4) |
| Chettri                   | 24 | 23.4 (15.1 – 31.6) | More than two                  | 13 | 16.9 (8.6 – 25.2)  |
| Newar                     | 4  | 16.3 (1.2 – 31.4)  | <b>Reason for travel</b>       |    |                    |
| Janajati                  | 45 | 22.7 (16.8 – 28.6) | Family pressure                | 3  | 30.7 (2.6 – 58.8)  |
| Dalit                     | 10 | 20.5 (9.1 – 31.9)  | Family conflict                | 2  | 62.5 (2.4 – 122.5) |
| Muslim                    | 2  | 21.4 (-2.5 – 45.4) | lack of employment             | 43 | 18.1 (13.2 – 23.1) |
| Madhesi                   | 2  | 8.6 (-3.9 – 21.3)  | less paid at work              | 11 | 13.4 (5.8 – 21)    |
| <b>Religion</b>           |    |                    | Low agriculture production     | 2  | 17.8 (-4.5 – 40.2) |
| Hindu                     | 72 | 22.2 (17.6 – 26.8) | To payback debt                | 10 | 27.1 (12.2 – 42)   |
| Buddhist                  | 15 | 17.4 (9.3 – 25.5)  | Poverty/Landlessness           | 19 | 33.1 (20.8 – 45.2) |
| Christian                 | 2  | 13.3 (-5.8 – 32.4) | Present political condition    | 2  | 38.4 (-5.6 – 82.5) |
| Muslim                    | 3  | 22.2 (0.9 – 43.6)  | Others                         | 1  | 15.3 (-17.3– 48.1) |
| Kirat                     | 1  | 14.2 (-9.7 – 38.2) | <b>Discussion with family</b>  |    |                    |
| <b>Marital Status</b>     |    |                    | Yes                            | 90 | 20.7 (16.9 – 24.5) |
| Unmarried                 | 36 | 21.2 (14.9 – 27.5) | No                             | 3  | 28.5 (-2.4 – 59.5) |
| Married                   | 56 | 20.7 (15.9 – 25.5) | <b>Take loan</b>               |    |                    |
| Widow/Widower             | 1  | 40 (-48.1 – 128.1) | Yes                            | 74 | 22.8 (18.2 – 27.4) |
| <b>Education Level</b>    |    |                    | No                             | 19 | 15.7 (9.2 – 22.1)  |
| Primary                   | 11 | 20.9 (9.2 – 32.5)  | <b>Pre-arranged employment</b> |    |                    |
| Secondary                 | 54 | 23.9 (18.3 – 29.4) | Yes                            | 76 | 20.4 (16.3 – 24.5) |
| Higher secondary          | 22 | 16.7 (10.2 – 23.1) | No                             | 17 | 23.2 (13.4 – 32.9) |

|                   |    |                    |                                   |    |                    |
|-------------------|----|--------------------|-----------------------------------|----|--------------------|
| University        | 6  | 17.2 (4.6 – 29.9)  | <b>Pre-arranged accommodation</b> |    |                    |
| <b>Employment</b> |    |                    | Yes                               | 75 | 20.5 (16.3 – 24.7) |
| Un-employed       | 38 | 22.6 (16.3 – 28.9) | No                                | 18 | 22.5 (13.4 – 31.7) |
| Agriculture       | 26 | 26.6 (17.6 – 35.6) | <b>Family/Relative network</b>    |    |                    |
| Unskilled manual  | 7  | 30.6 (10.6 – 50.6) | Yes                               | 63 | 19.4 (15.1 – 23.8) |
| Skilled manual    | 13 | 15.1 (7.6 – 22.6)  | No                                | 30 | 24.3 (16.8 – 31.7) |
| Business          | 6  | 16.4 (4.3 – 28.5)  | <b>Language</b>                   |    |                    |
| Professional/Job  | 3  | 8.6 (-1.5 – 18.9)  | Yes                               | 36 | 18.4 (12.9 – 23.9) |
|                   |    |                    | No                                | 57 | 22.8 (17.6 – 28.0) |

120 CI = Confidence Interval

121 In bivariate logistic regression, none of the socio-demographic and foreign employment related  
 122 variables were found associated with psychological distress except for the perception of a risk  
 123 factor at the workplace. Perception of bad working condition (OR=4.28), not following contract  
 124 properly (OR=3.21), poor safety measures at work (OR=3.15), not getting salary as contracted  
 125 (OR=2.42), poor living place (OR=2.11), not getting leave (OR=1.99), food problem (OR=1.83)  
 126 and not getting rest at work (OR=1.81) were significantly associated with psychological distress.  
 127 Final multivariate analysis showed psychological distress significantly associated with the  
 128 female (AOR=2.01) and perception of a bad working condition at work (AOR=2.44).

129 Table 2: Bivariate and multivariate logistic regression of psychological distress

| Variable          | OR        | 95% CI      | p-value | AOR       | 95% CI      | p-value |
|-------------------|-----------|-------------|---------|-----------|-------------|---------|
| <b>Gender</b>     |           |             |         |           |             |         |
| Male              | Reference |             |         | Reference |             |         |
| Female            | 1.52      | 0.86 – 2.71 | 0.145   | 2.02      | 1.03 – 3.94 | 0.041   |
| <b>Employment</b> |           |             |         |           |             |         |



|                                                |           |              |       |           |               |       |
|------------------------------------------------|-----------|--------------|-------|-----------|---------------|-------|
| Unemployed                                     | 3.07      | 0.82 – 11.43 | 0.094 | 3.50      | 0.75 – 16.37  | 0.112 |
| Agriculture                                    | 3.81      | 0.99 – 14.62 | 0.051 | 3.65      | 0.74 – 17.97  | 0.112 |
| Unskilled manual                               | 4.63      | 0.97 – 22.08 | 0.054 | 2.77      | 0.44 – 17.27  | 0.275 |
| Skilled manual                                 | 1.88      | 0.46 – 7.55  | 0.373 | 1.77      | 0.35 – 8.79   | 0.485 |
| Business                                       | 2.07      | 0.44 – 9.57  | 0.352 | 2.04      | 0.35 – 11.99  | 0.431 |
| Professional/Job                               | Reference |              |       | Reference |               |       |
| <b>Place of residence</b>                      |           |              |       |           |               |       |
| Urban                                          | Reference |              |       | Reference |               |       |
| Rural                                          | 1.39      | 0.88 – 2.20  | 0.155 | 1.31      | 0.77 – 2.20   | 0.312 |
| <b>Frequency of travel</b>                     |           |              |       |           |               |       |
| First                                          | 1.15      | 0.58 – 2.28  | 0.688 | 0.87      | 0.38 – 1.95   | 0.734 |
| Twice                                          | 1.62      | 0.82 – 3.20  | 0.159 | 1.44      | 0.67 – 3.08   | 0.347 |
| More than two                                  | Reference |              |       | Reference |               |       |
| <b>Reason for Travel</b>                       |           |              |       |           |               |       |
| Family pressure                                | 2.44      | 0.18 – 32.86 | 0.500 | 1.20      | 0.07 – 20.59  | 0.899 |
| Family conflict                                | 9.16      | 0.39 – 211.1 | 0.166 | 7.48      | 0.25 – 224.67 | 0.247 |
| Lack of employment                             | 1.22      | 0.12 – 12.18 | 0.863 | 0.61      | 0.05 – 7.17   | 0.698 |
| Less paid at work                              | 0.85      | 0.08 – 9.06  | 0.894 | 0.59      | 0.05 – 7.46   | 0.683 |
| Low agriculture production                     | 1.19      | 0.08 – 17.83 | 0.897 | 0.55      | 0.03 – 10.23  | 0.688 |
| To payback debt                                | 2.05      | 0.18 – 22.41 | 0.556 | 0.80      | 0.06 – 10.51  | 0.866 |
| Poverty                                        | 2.71      | 0.26 – 28.19 | 0.402 | 1.45      | 0.12 – 17.44  | 0.771 |
| Present political condition                    | 3.43      | 0.20 – 58.33 | 0.393 | 4.45      | 0.21 – 93.36  | 0.336 |
| Others                                         | Reference |              |       | Reference |               |       |
| <b>Loan</b>                                    |           |              |       |           |               |       |
| Yes                                            | 1.59      | 0.91 – 2.76  | 0.098 | 1.22      | 0.65 – 2.27   | 0.530 |
| No                                             | Reference |              |       | Reference |               |       |
| <b>Perception of risk factors at workplace</b> |           |              |       |           |               |       |

|                                  |      |             |       |      |             |       |
|----------------------------------|------|-------------|-------|------|-------------|-------|
| Bad working condition            | 4.28 | 2.16 – 8.44 | 0.000 | 2.44 | 1.02 – 5.87 | 0.046 |
| Poor safety measure              | 3.15 | 1.71 – 5.83 | 0.000 | 1.50 | 0.67 – 3.39 | 0.327 |
| Work other than told             | 1.47 | 0.88 – 2.46 | 0.141 | 0.86 | 0.44 – 1.67 | 0.649 |
| Work long hour                   | 1.41 | 0.89 – 2.24 | 0.145 | 1.02 | 0.57 -1.83  | 0.942 |
| Festival problem                 | 1.38 | 0.87 – 2.20 | 0.164 | 1.09 | 0.59 – 1.99 | 0.780 |
| Food problem                     | 1.83 | 1.15 – 2.91 | 0.010 | 1.78 | 0.96 – 3.32 | 0.069 |
| Unfavorable weather              | 1.36 | 0.85 – 2.18 | 0.194 | 1.22 | 0.69 – 2.14 | 0.484 |
| Did not follow contract          | 3.21 | 1.79 – 5.78 | 0.000 | 2.03 | 0.92 – 4.36 | 0.080 |
| Cannot change work               | 0.66 | 0.41 – 1.05 | 0.080 | 0.59 | 0.34 – 1.02 | 0.061 |
| Did not get salary as contracted | 2.42 | 1.39 – 4.19 | 0.002 | 1.63 | 0.75 – 3.56 | 0.221 |
| Did not get leave                | 1.99 | 1.04 – 3.78 | 0.036 | 1.06 | 0.46 – 2.47 | 0.888 |
| did not get paid leave           | 1.44 | 0.91 – 2.28 | 0.119 | 1.15 | 0.67 – 1.98 | 0.606 |
| Get unnecessary problem          | 1.34 | 0.85 – 2.13 | 0.209 | 0.81 | 0.45 – 1.46 | 0.490 |
| Did not get rest                 | 1.81 | 1.12 – 2.94 | 0.016 | 1.35 | 0.74 – 2.46 | 0.331 |
| Poor living place                | 2.11 | 1.17 – 3.82 | 0.013 | 0.89 | 0.41 – 1.96 | 0.783 |
| Cannot send money on time        | 1.70 | 0.93 – 3.12 | 0.085 | 0.69 | 0.29 – 1.62 | 0.396 |

130 OR = Odds Ratio; AOR = Adjusted Odds Ratio; CI = Confidence Interval

## 131 Discussion

132 The objective of this study was to identify the prevalence of psychological distress and its  
 133 associated factors among migrant workers of Nepal departing to GCC countries. Although the  
 134 psychological distress among Nepali migrant workers was studied at the destination and after  
 135 return, there is a dearth of evidence regarding the mental health of migrant workers during the  
 136 pre-departure phase. Psychological distress had been found significant among migrant workers

137 during the pre-departure phase from this study. Besides, the perception of different risk factors at  
138 the workplace were found significantly associated with pre-departure psychological distress.

139 This study showed symptoms of psychological distress (DASS total score > 40) among 20.9% of  
140 migrant workers during the pre-departure phase. The prevalence of psychological distress in this  
141 study was found higher than the prevalence reported in recent studies conducted among returnee  
142 Nepalese migrant workers from India using the 12-item General Health Questionnaire (GHQ-12)  
143 tool to measure psychological distress [11,12]. A recent study conducted by the International  
144 Organization for Migration in Nepal had found psychological distress among 13.4% of returnee  
145 migrant workers from India [12]. Similarly, psychological distress was also reported in high  
146 number among Sri-Lankan aspiring migrant workers, which reported as 44.2% from GHQ-12  
147 [13]. The difference in the stage of migration and tool to measure prevalence might be the reason  
148 for the higher prevalence of psychological distress.

149 Present findings are found similar to the reported mental health problem among migrant workers  
150 in different phases of migration in recent national and international studies [6,14]. Poor mental  
151 health was reported by 23% of returnee migrant workers in Nepal [6]. Likewise, a 22% of non-  
152 domestic migrant workers in Singapore were found at higher risk of psychological distress [14].  
153 Psychological distress reported in this study was also found similar with the depression and  
154 anxiety among migrant workers reported in the systematic analysis of the studies conducted  
155 globally, which was 20% and 21% respectively [15].

156 From the multivariate analysis, females and those who had a perception of the bad working  
157 condition were found twice at risk of getting symptoms of psychological distress compared to  
158 males and those who had a perception of a good working condition at destination. Perception and

159 post-migration expectations were associated with the occurrence of stress during the pre-  
160 migration phase [16]. A global review of literature on factor associated with common mental  
161 disorder among migrant population also reported that women and migrants who had bad working  
162 condition had higher mental health problems [17]. Similar to the present findings, Nepalese  
163 returnee migrants who had perceived risk and bad working condition at destination had also  
164 reported two times more mental health problems [6]. Other perceptions regarding working and  
165 living environment at destination were found associated with pre-departure psychological  
166 distress in bivariate analysis. These risk factors were also identified significantly associated with  
167 different health and mental health related problems among migrant workers in different studies  
168 [17–20]. Although Nepalese migrant workers are familiar with the risk associated with  
169 employment at Gulf countries, limited opportunities and responsibilities of a family at the place  
170 of origin are the reason behind simply accommodating these risks [3].

171 The limitation of the study was the exclusion of illiterate, non-Nepali speaking, and those who  
172 were traveling to the countries other than the GCC countries, which lacks the representation of  
173 all the migrant workers of Nepal.

## 174 **Conclusion**

175 Findings from the study indicate that migrant workers face significant challenges for poor mental  
176 health in all phases of migration including the pre-departure. Different perceptions of work and  
177 living environment at destination were found significantly associated with pre-departure  
178 psychological distress indicating the need for in-depth orientation before departure to the  
179 destination. Since females were found more at risk of getting symptoms of psychological  
180 distress, further quantitative, as well as a qualitative study, are required to understand the causes

181 of psychological distress during the pre-departure phase. As well, migrant workers could be  
182 provided with the coping skills for psychological distress during their pre-departure orientation  
183 program.

## 184 **Acknowledgments**

185 We appreciate the support and feedback provided by all the faculty of the School of Public  
186 Health, Patan Academy of Health Sciences. We would like to thank all the participants who took  
187 part in the study.

## 188 **References**

- 189 1. IOM. World Migration Report 2020. 2020. Available from: [www.iom.int](http://www.iom.int)
- 190 2. IOM. World Migration Report 2018. 2018. Available from:  
191 <https://www.iom.int/wmr/world-migration-report-2018>
- 192 3. Binayak Malla MSR. Understanding Nepalese Labor Migration to Gulf Countries. *J*  
193 *Poverty*. 2017;21(5):411–33. doi: <https://doi.org/10.1080/10875549.2016.1217578>
- 194 4. Government of Nepal, Ministry of Labour, Employment and Social Security. Labour  
195 Migration for Employment: A Status Report for Nepal:2015/2016-2016/2017. Gov Nepal.  
196 2018. Available from: [https://asiafoundation.org/wp-content/uploads/2018/05/Nepal-](https://asiafoundation.org/wp-content/uploads/2018/05/Nepal-Labor-Migration-status-report-2015-16-to-2016-17.pdf)  
197 [Labor-Migration-status-report-2015-16-to-2016-17.pdf](https://asiafoundation.org/wp-content/uploads/2018/05/Nepal-Labor-Migration-status-report-2015-16-to-2016-17.pdf)
- 198 5. Abubakar I, Aldridge RW, Devakumar D, Orcutt M, Burns R, Barreto ML, et al. The  
199 UCL–Lancet Commission on Migration and Health: the health of a world on the move.  
200 *Lancet*. 2018;392. doi: [10.1016/S0140-6736\(18\)32114-7](https://doi.org/10.1016/S0140-6736(18)32114-7)

- 201 6. Adhikary P, Sheppard ZA, Keen S, Teijlingen E Van. Risky work : Accidents among  
202 Nepalese migrant workers in Malaysia , Qatar and Saudi Arabia. *Heal Prospect J Public*  
203 *Heal.* 2017;3–10. doi: 10.3126/hprospect.v16i2.18643
- 204 7. Tripur Manandhar MV der P. Migrant Workers’ Psychological Wellbeing: The Case of  
205 Nepalese Construction Workers in Qatar. 2015. p. 140–6. Available from:  
206 [https://s3.amazonaws.com/academia.edu.documents/38210948/Pocceedings-New-Voices-](https://s3.amazonaws.com/academia.edu.documents/38210948/Pocceedings-New-Voices-2015.pdf?response-content-disposition=inline%3Bfilename%3DVulnerability_Shifts_in_a_Transitioning.pdf&X-Amz-Algorithm=AWS4-HMAC-SHA256&X-Amz-Credential=AKIAIWOWYYGZ2Y53UL3A%2F)  
207 [2015.pdf?response-content-disposition=inline%3B](https://s3.amazonaws.com/academia.edu.documents/38210948/Pocceedings-New-Voices-2015.pdf?response-content-disposition=inline%3Bfilename%3DVulnerability_Shifts_in_a_Transitioning.pdf&X-Amz-Algorithm=AWS4-HMAC-SHA256&X-Amz-Credential=AKIAIWOWYYGZ2Y53UL3A%2F)  
208 [filename%3DVulnerability\\_Shifts\\_in\\_a\\_Transitioning.pdf&X-Amz-Algorithm=AWS4-](https://s3.amazonaws.com/academia.edu.documents/38210948/Pocceedings-New-Voices-2015.pdf?response-content-disposition=inline%3Bfilename%3DVulnerability_Shifts_in_a_Transitioning.pdf&X-Amz-Algorithm=AWS4-HMAC-SHA256&X-Amz-Credential=AKIAIWOWYYGZ2Y53UL3A%2F)  
209 [HMAC-SHA256&X-Amz-Credential=AKIAIWOWYYGZ2Y53UL3A%2F](https://s3.amazonaws.com/academia.edu.documents/38210948/Pocceedings-New-Voices-2015.pdf?response-content-disposition=inline%3Bfilename%3DVulnerability_Shifts_in_a_Transitioning.pdf&X-Amz-Algorithm=AWS4-HMAC-SHA256&X-Amz-Credential=AKIAIWOWYYGZ2Y53UL3A%2F)
- 210 8. Poudel OP, Thapa B, Bhandary S. Pre-departure psychological distress , depression ,  
211 anxiety , stress and perception of risk factors at workplace among migrant workers of  
212 Nepal : A pilot study. *J Gen Pract Emerg Med Nepal.* 2019;(8):20–5. Available from:  
213 [www.jgpeman.com](http://www.jgpeman.com)
- 214 9. Lovibond, SH, Lovibond P. Manual for the depression anxiety stress scales. *Psychol*  
215 *Found Aust.* 1995. Available from: <http://www2.psy.unsw.edu.au/dass/>
- 216 10. Tonsing KN. Psychometric properties and validation of Nepali version of the Depression  
217 Anxiety Stress Scales ( DASS-21 ). *Asian J Psychiatr.* 2018;8(December 2010):63–6. doi:  
218 10.1016/j.ajp.2013.11.001
- 219 11. Saraswati LR, Rob U, Puri M, Sarna A. LIFE ACROSS THE BORDER : MIGRANTS IN  
220 SOUTH ASIA. 2015. Available from:  
221 [https://assets.publishing.service.gov.uk/media/57a0897f40f0b649740000e8/61263\\_Final-](https://assets.publishing.service.gov.uk/media/57a0897f40f0b649740000e8/61263_Final-Migrant-Report_Life-across-the-border.pdf)  
222 [Migrant-Report\\_Life-across-the-border.pdf](https://assets.publishing.service.gov.uk/media/57a0897f40f0b649740000e8/61263_Final-Migrant-Report_Life-across-the-border.pdf)

- 223 12. IOM Nepal. Research on the health vulnerabilities of the cross border migrants from  
224 Nepal. 2019. Available from: <http://www.iom.int/nepal>
- 225 13. Galappaththi R. Psychological Distress among Aspiring Sri Lankan Migrant Labour  
226 Workers and Associated demographic variables. 2018. Available from:  
227 <https://www.academia.edu/38368829/>
- 228 14. Ang JW, Chia C, Koh CJ, Chua BWB, Narayanaswamy S, Wijaya L, et al. Healthcare-  
229 seeking behaviour, barriers and mental health of non-domestic migrant workers in  
230 Singapore. *BMJ Glob Heal*. 2017;2(2). doi: 10.1136/bmjgh-2016-000213
- 231 15. Lindert J, Priebe S, Mielck A, Bra E. Depression and anxiety in labor migrants and  
232 refugees – A systematic review and meta-analysis. *Soc Sci Med*. 2009;69:246–57. doi:  
233 <https://doi.org/10.1016/j.socscimed.2009.04.032%0A>
- 234 16. Jasinskaja-lahti I, Yijälä A. The model of pre-aculturative stress — A pre-migration  
235 study of potential migrants from Russia to Finland. *Int J Intercult Relations*. 2011;35:499–  
236 510. doi: 10.1016/j.ijintrel.2010.11.003
- 237 17. Martínez-Ortega JM, Gutiérrez-Rojas L, Mendieta-Marichal Y, Jurado D, Gurpegui M,  
238 Alarcón RD. Factors associated with psychological distress or common mental disorders  
239 in migrant populations across the world. *Rev Psiquiatr y Salud Ment (English Ed)*.  
240 2017;10(1):45–58. doi: 10.1016/j.rpsmen.2017.02.004
- 241 18. Regmi PR, Aryal N, van Teijlingen E, Simkhada P, Adhikary P. Nepali Migrant Workers  
242 and the Need for Pre-departure Training on Mental Health: A Qualitative Study. *J Immigr  
243 Minor Heal*. 2019;(0123456789). doi: <https://doi.org/10.1007/s10903-019-00960-z>

- 244 19. Regmi PR, van Teijlingen E, Mahato P, Aryal N, Jadhav N, Simkhada P, et al. The Health  
245 of Nepali Migrants in India: A Qualitative Study of Lifestyles and Risks. *Int J Environ*  
246 *Res Public Health*. 2019;16(19):3655. doi: 10.3390/ijerph16193655
- 247 20. Simkhada P, Van Teijlingen E, Gurung M, Wasti SP. A survey of health problems of  
248 Nepalese female migrants workers in the Middle-East and Malaysia. *BMC Int Health*  
249 *Hum Rights*. 2018;18(1):1–7. doi: 10.1186/s12914-018-0145-7
- 250
